# Supplementary material for: PIN7 Auxin Carrier Has a Preferential Role in Terminating Radial Root Expansion in Arabidopsis thaliana
Source: PubMed Central journal article supplement (PMC5979548; doi:10.3390/ijms19041238), 2018-04-19
Supplement: ijms-19-01238-s001.pdf [file ijms-19-01238-s001.pdf]

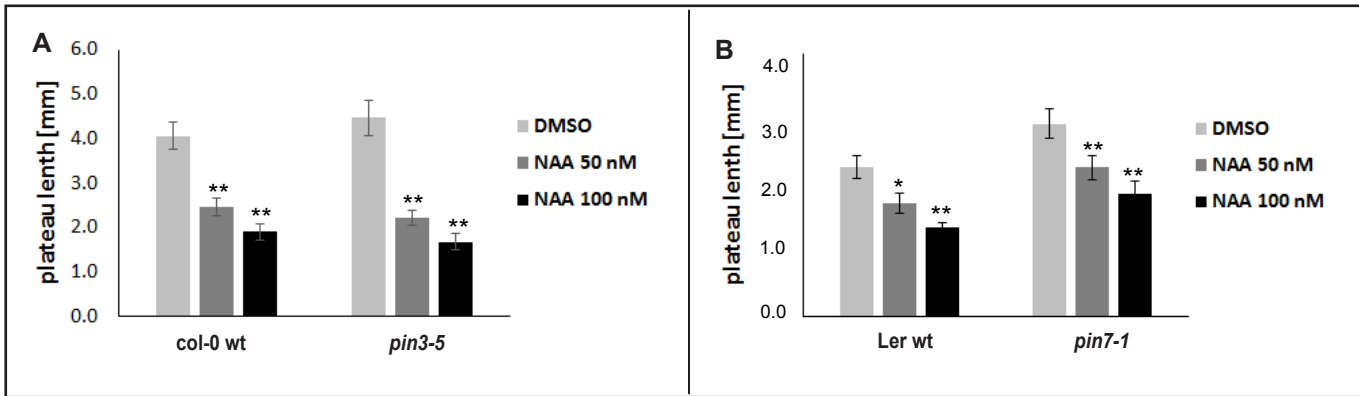

**Supplemental Figure 1.** Effect of auxin treatments on plateau length of *PIN3* and *PIN7* single mutants. A, B) 4-DAG seedlings of *pin3-5* (A) (in Col-0 wt background) and *pin7-1* (in Ler background) (B) remain responsive to the effect of auxin treatments on plateau length. A representative experiment is shown, for each mutant line and corresponding wt control. Error bars represent SEM ( $n > 30$  LR per experiment). Statistical significance was evaluated by two-way ANOVA followed by multiple comparisons Tukey test. One ( $p < 0.05$ ) and two asterisks ( $p < 0.01$ ) denote statistically significant differences between NAA treatments and corresponding DMSO controls.
